# Supplementary material for: Geographic disparities and predictors of suicide mortality risk in Florida: spatial scan statistics and negative binomial modeling
Source: PeerJ. 2025 Nov 4;13:e20075. doi: 10.7717/peerj.20075 (PMC12593724; doi:10.7717/peerj.20075)
Supplement: Supplemental Information 1 — All variables used in the analyses. [file peerj-13-20075-s001.xlsx]

## Sheet: Study Data
FIPS	id	County	pop_2018_5yrest	suicide_count	mort_rate_age_adj	female	male	r_18_44yrs	r_45_64yrs	r_65_above	r_less_18yrs	inpatient	decendents_home	nursing_home	other_place	er_outpatient	never_married	widowed	divorced	unknown_marital	married	less_high	high_school	some_college	associates	bachelors	unknown_educ	more_bacheors	drug_poisoning	hanging_strang	drowning	firearm	hot_objects	sharp_object	jump_ly	vehicle_crashing	other_means	race_white	race_black	race_asian	race_an	race_pacific_islander	other_races	hisp_latino	smoker	obese	physically_inactive	excessive_drinking	unemployment
1	29	Alachua	263148	105	4.00825	23.8095	76.1905	46.6667	26.6667	20	6.66667	11.4286	0	0.952381	76.1905	11.4286	45.7143	5.71429	17.1429	1.90476	29.5238	13.3333	29.5238	15.2381	7.61905	18.0952	1.90476	14.2857	9.52381	35.2381	0	45.7143	0.952381	1.90476	4.7619	0	1.90476	90.4762	7.61905	1.90476	0	0	0	5.71429	17.8756	27.2	23.4	21.09	2.94863
5	19	Bay	27785	10	45.9455	20	80	40	30	20	10	10	0	0	80	10	10	10	40	0	40	0	80	10	0	10	0	0	0	10	0	90	0	0	0	0	0	100	0	0	0	0	0	10	25.2331	38.3	33.8	18.1711	3.10496
3	18	Baker	182482	127	0.547225	22.0472	77.9528	33.0709	40.1575	25.1969	1.5748	5.51181	55.1181	0.787402	31.4961	7.08661	25.9843	8.66142	23.622	2.3622	39.3701	14.1732	33.0709	21.2598	7.08661	14.9606	2.3622	7.08661	11.811	18.8976	3.14961	59.0551	1.5748	2.3622	3.14961	0	0	98.4252	1.5748	0	0	0	0	3.93701	21.8822	30	31	18.7405	3.86419
7	27	Bradford	26979	13	4.919	15.3846	84.6154	38.4615	46.1538	7.69231	7.69231	0	7.69231	0	76.9231	15.3846	46.1538	7.69231	15.3846	0	30.7692	7.69231	46.1538	30.7692	7.69231	7.69231	0	0	7.69231	15.3846	0	69.2308	0	0	0	0	7.69231	92.3077	7.69231	0	0	0	0	0	27.3937	37.1	35	18.2974	3.13686
9	40	Brevard	576808	405	6.55364	26.4198	73.5802	27.9012	39.7531	29.8765	2.46914	6.17284	63.7037	0.740741	20.7407	8.64198	27.1605	11.1111	27.6543	1.48148	32.5926	10.8642	35.0617	19.5062	12.5926	13.5802	1.48148	6.91358	17.284	23.2099	1.48148	52.0988	0.246914	1.48148	3.45679	0	0.740741	94.5679	2.96296	0.246914	0	0.987654	1.23457	5.4321	20.0672	28.8	26.8	21.2018	3.18987
11	61	Broward	1909151	706	3.62074	21.813	78.187	34.8442	40.7932	23.0878	1.27479	7.50708	54.1076	1.13314	28.0453	9.2068	36.8272	4.67422	22.238	5.09915	31.1615	10.0567	33.5694	14.5892	8.92351	19.1218	4.95751	8.78187	13.7394	26.3456	2.12465	46.034	0.141643	2.83286	7.93201	0.283286	0.566572	83.1445	10.9065	1.69972	0	1.983	2.26629	23.0878	16.8838	24.6	23.7	18.6729	3.04713
13	14	Calhoun	14444	6	4.2037	66.6667	33.3333	50	33.3333	16.6667	0	0	83.3333	0	16.6667	0	33.3333	0	66.6667	0	0	0	33.3333	50	16.6667	0	0	0	33.3333	16.6667	0	50	0	0	0	0	0	100	0	0	0	0	0	0	25.5057	36.9	41.4	17.5911	4.08799
15	57	Charlotte	176954	116	5.91765	14.6552	85.3448	18.1034	42.2414	37.931	1.72414	4.31034	69.8276	0	22.4138	3.44828	22.4138	12.931	25	0.862069	38.7931	10.3448	50	14.6552	3.44828	12.931	1.72414	6.89655	9.48276	21.5517	1.72414	62.069	0	3.44828	1.72414	0	0	94.8276	2.58621	0.862069	0	0.862069	0.862069	6.03448	21.335	27.6	26.2	19.9096	3.65407
17	37	Citrus	143087	132	8.24342	15.1515	84.8485	21.2121	34.0909	43.1818	1.51515	3.78788	73.4848	0.757576	17.4242	4.54545	18.1818	14.3939	27.2727	0	40.1515	16.6667	45.4545	19.697	7.57576	7.57576	0	3.0303	9.84848	17.4242	1.51515	69.697	0	0.757576	0.757576	0	0	96.9697	0.757576	0.757576	0.757576	0	0.757576	1.51515	23.1302	28.7	35.7	21.3998	4.81457
19	26	Clay	207291	118	5.76339	23.7288	76.2712	35.5932	38.1356	21.1864	5.08475	5.08475	69.4915	3.38983	13.5593	8.47458	30.5085	5.08475	16.9492	2.54237	44.9153	14.4068	33.0508	20.339	11.8644	9.32203	2.54237	8.47458	13.5593	16.9492	1.69492	57.6271	0	5.08475	4.23729	0	0.847458	92.3729	3.38983	0	0	3.38983	0.847458	6.77966	20.1485	33.2	29.5	22.1814	3.01807
21	60	Collier	363922	157	4.30738	23.5669	76.4331	28.0255	42.0382	28.6624	1.27389	2.54777	55.414	0.636943	37.5796	3.82166	29.9363	10.828	21.0191	2.54777	35.6688	8.9172	33.758	19.1083	8.9172	15.9236	2.54777	10.828	17.1975	26.7516	1.91083	49.0446	0	1.91083	2.54777	0.636943	0	94.9045	1.27389	1.27389	0.636943	1.27389	0.636943	15.9236	15.9715	21.9	22.9	21.6557	3.09258
23	16	Columbia	69105	48	7.0413	22.9167	77.0833	33.3333	50	14.5833	2.08333	8.33333	66.6667	0	22.9167	2.08333	25	4.16667	22.9167	10.4167	37.5	20.8333	45.8333	12.5	10.4167	4.16667	6.25	0	14.5833	22.9167	0	62.5	0	0	0	0	0	97.9167	2.08333	0	0	0	0	10.4167	24.8234	36.8	36.7	19.178	3.24194
27	54	DeSoto	36399	18	4.71576	22.2222	77.7778	27.7778	38.8889	33.3333	0	5.55556	61.1111	0	11.1111	22.2222	27.7778	5.55556	22.2222	0	44.4444	22.2222	55.5556	11.1111	0	5.55556	0	5.55556	0	38.8889	0	61.1111	0	0	0	0	0	100	0	0	0	0	0	22.2222	26.2539	31.3	35.7	20.3229	3.5178
29	62	Dixie	16437	9	4.06988	11.1111	88.8889	0	55.5556	44.4444	0	11.1111	0	0	88.8889	0	0	11.1111	44.4444	0	44.4444	11.1111	55.5556	11.1111	11.1111	11.1111	0	0	0	0	0	100	0	0	0	0	0	100	0	0	0	0	0	0	30.9094	33.1	43.4	18.8078	3.8092
31	17	Duval	924229	487	5.33102	24.23	75.77	41.4784	36.961	19.0965	2.46407	5.74949	60.9856	0.410678	21.7659	11.0883	35.3183	5.13347	25.0513	3.28542	31.2115	13.5524	38.193	12.731	9.44559	16.0164	3.90144	6.16016	15.1951	20.5339	2.25873	55.0308	0.205339	2.25873	3.49076	0.821355	0.205339	83.5729	13.1417	2.25873	0	0.616016	0.410678	11.0883	18.6388	32	26.7	18.4935	3.26377
33	3	Escambia	311522	170	5.50851	20	80	42.9412	35.2941	19.4118	2.35294	2.94118	57.0588	1.17647	33.5294	5.29412	32.3529	5.29412	24.7059	1.17647	36.4706	15.2941	41.7647	11.7647	10	10.5882	2.94118	7.64706	14.7059	20.5882	1.17647	59.4118	0	1.17647	2.35294	0	0.588235	89.4118	8.23529	0	0	2.35294	0	8.23529	19.9593	29.4	28.8	20.4889	3.19766
35	32	Flagler	107139	82	7.33631	26.8293	73.1707	24.3902	42.6829	30.4878	2.43902	4.87805	62.1951	3.65854	21.9512	7.31707	23.1707	10.9756	24.3902	2.43902	39.0244	8.53659	51.2195	14.6341	8.53659	7.31707	2.43902	7.31707	15.8537	24.3902	2.43902	53.6585	0	0	1.21951	1.21951	1.21951	90.2439	8.53659	0	0	0	1.21951	8.53659	20.0666	26.6	26.2	21.1574	3.81671
37	67	Franklin	11736	7	5.08792	28.5714	71.4286	28.5714	28.5714	42.8571	0	0	14.2857	0	85.7143	0	14.2857	14.2857	14.2857	0	57.1429	42.8571	14.2857	42.8571	0	0	0	0	0	42.8571	0	57.1429	0	0	0	0	0	100	0	0	0	0	0	0	25.9586	34.4	31.4	24.1354	3.52688
39	9	Gadsden	46017	21	4.88921	19.0476	80.9524	66.6667	23.8095	9.52381	0	14.2857	14.2857	0	66.6667	4.7619	33.3333	9.52381	19.0476	0	38.0952	19.0476	47.619	14.2857	9.52381	9.52381	0	0	9.52381	28.5714	0	61.9048	0	0	0	0	0	90.4762	9.52381	0	0	0	0	14.2857	22.5276	43.5	35.3	17.254	4.09919
41	30	Gilchrist	17615	12	6.27598	16.6667	83.3333	8.33333	58.3333	25	8.33333	0	8.33333	0	91.6667	0	25	8.33333	16.6667	8.33333	41.6667	33.3333	41.6667	0	8.33333	8.33333	8.33333	0	8.33333	16.6667	0	75	0	0	0	0	0	100	0	0	0	0	0	0	25.9952	37.7	35.2	19.1645	3.42897
43	56	Glades	13363	6	5.13827	16.6667	83.3333	50	50	0	0	0	66.6667	0	33.3333	0	16.6667	0	33.3333	0	50	16.6667	50	16.6667	0	16.6667	0	0	0	50	0	50	0	0	0	0	0	100	0	0	0	0	0	0	26.0491	39	35	19.7434	3.91902
45	25	Gulf	16055	10	5.73814	50	50	30	50	20	0	0	40	0	60	0	0	30	30	10	30	10	50	20	10	0	10	0	10	30	0	50	10	0	0	0	0	100	0	0	0	0	0	0	23.828	32.6	31.9	21.4052	4.79903
47	13	Hamilton	14269	4	2.72694	0	100	50	25	25	0	25	25	0	50	0	0	0	0	0	100	0	75	0	0	25	0	0	0	50	0	50	0	0	0	0	0	75	0	0	25	0	0	0	27.7141	39.8	37	18.7735	4.10138
49	50	Hardee	27228	10	3.84335	10	90	40	30	20	10	0	80	0	0	20	20	0	30	0	50	30	40	0	10	20	0	0	0	30	0	70	0	0	0	0	0	100	0	0	0	0	0	30	24.1235	39.7	36.2	16.2638	5.03411
51	59	Hendry	40127	20	5.13404	15	85	40	15	35	10	5	50	5	30	10	45	0	20	5	30	30	45	10	0	5	5	5	5	20	0	75	0	0	0	0	0	90	10	0	0	0	0	30	23.6561	35	34.8	17.9254	5.81895
53	42	Hernando	182696	108	5.69786	25.9259	74.0741	22.2222	53.7037	24.0741	0	5.55556	62.963	0	21.2963	10.1852	18.5185	10.1852	24.0741	1.85185	45.3704	11.1111	38.8889	21.2963	10.1852	10.1852	1.85185	6.48148	19.4444	17.5926	0	60.1852	0	0.925926	1.85185	0	0	98.1481	0.925926	0	0	0	0.925926	11.1111	23.0401	32.3	31.1	18.7872	4.19476
55	48	Highlands	102101	85	8.01652	25.8824	74.1176	29.4118	30.5882	40	0	7.05882	57.6471	1.17647	25.8824	8.23529	24.7059	15.2941	20	0	40	12.9412	54.1176	12.9412	4.70588	7.05882	0	8.23529	18.8235	18.8235	3.52941	56.4706	0	1.17647	1.17647	0	0	95.2941	3.52941	0	0	1.17647	0	10.5882	22.4199	30.4	34.1	18.6857	4.54923
57	46	Hillsborough	1378883	615	4.52763	22.439	77.561	36.2602	40.3252	21.3008	2.11382	6.34146	60.9756	0	22.2764	10.4065	37.3984	7.96748	21.7886	0.813008	32.0325	15.4472	35.2846	15.7724	8.61789	14.4715	1.46341	8.94309	15.2846	25.8537	2.27642	51.0569	0.162602	1.13821	3.90244	0.162602	0.162602	89.2683	7.80488	1.46341	0.162602	0.813008	0.487805	15.6098	17.6155	26.4	23.4	18.9434	3.08583
59	5	Holmes	19430	10	4.53631	10	90	20	40	40	0	0	80	0	20	0	20	10	10	0	60	20	50	30	0	0	0	0	10	10	0	80	0	0	0	0	0	100	0	0	0	0	0	0	28.7547	35.8	37.4	17.6672	3.5411
61	47	Indian River	150984	92	5.90492	22.8261	77.1739	28.2609	36.9565	33.6957	1.08696	4.34783	63.0435	1.08696	21.7391	9.78261	23.913	10.8696	31.5217	1.08696	32.6087	10.8696	35.8696	16.3043	9.78261	22.8261	0	4.34783	13.0435	22.8261	1.08696	60.8696	0	0	2.17391	0	0	100	0	0	0	0	0	5.43478	20.6036	26.6	25.6	22.0242	3.83152
63	1	Jackson	48472	25	4.98443	16	84	44	32	24	0	4	36	0	48	12	24	8	24	4	40	16	52	8	8	12	4	0	12	16	4	60	0	8	0	0	0	92	4	0	4	0	0	8	25.809	37.1	37.3	18.7342	3.63371
65	11	Jefferson	14105	7	4.15452	42.8571	57.1429	14.2857	57.1429	28.5714	0	0	14.2857	0	85.7143	0	0	14.2857	28.5714	0	57.1429	14.2857	28.5714	28.5714	0	14.2857	0	14.2857	57.1429	0	0	42.8571	0	0	0	0	0	100	0	0	0	0	0	0	22.173	35.1	26.1	20.6868	3.32563
67	23	Lafayette	8744	0	0	0	0	0	0	0	0	0	0	0	0	0	0	0	0	0	0	0	0	0	0	0	0	0	0	0	0	0	0	0	0	0	0	0	0	0	0	0	0	0	27.1364	33.9	33.3	17.9624	3.01226
69	36	Lake	335362	238	270.831	22.6891	77.3109	28.9916	38.2353	30.2521	2.52101	10.5042	61.3445	1.68067	18.0672	8.40336	31.5126	8.40336	22.2689	0.420168	37.395	15.9664	42.437	15.1261	7.98319	10.084	0.840336	7.56303	16.8067	20.1681	2.10084	57.563	0	1.2605	1.68067	0.420168	0	93.2773	3.36134	0.840336	0.420168	1.2605	0.840336	4.20168	18.8644	31.4	28.4	19.3656	3.21203
71	66	Lee	718679	359	10.302	19.4986	80.5014	28.6908	37.6045	31.4763	2.22841	7.79944	63.2312	0.835655	22.8412	5.29248	29.2479	9.7493	28.9694	0.835655	31.1978	12.8134	40.9471	18.663	6.40669	13.3705	0.835655	6.96379	12.8134	26.1838	1.67131	55.9889	0	1.94986	0.557103	0.557103	0.278552	95.5432	3.06407	0.835655	0	0.557103	0	10.3064	19.4469	25	24.5	23.1797	3.1351
73	10	Leon	288102	99	1.47409	24.2424	75.7576	46.4646	26.2626	23.2323	4.0404	6.06061	29.2929	0	55.5556	9.09091	40.404	7.07071	17.1717	0	35.3535	10.101	23.2323	18.1818	12.1212	21.2121	0	15.1515	17.1717	19.1919	0	57.5758	0	2.0202	3.0303	1.0101	0	90.9091	6.06061	2.0202	0	0	1.0101	4.0404	18.6041	31.1	21.8	19.9483	3.07409
75	33	Levy	39961	21	0.786303	19.0476	80.9524	28.5714	42.8571	28.5714	0	4.7619	4.7619	0	90.4762	0	23.8095	4.7619	23.8095	0	47.619	19.0476	47.619	9.52381	14.2857	4.7619	4.7619	0	4.7619	19.0476	0	76.1905	0	0	0	0	0	100	0	0	0	0	0	4.7619	25.427	33.3	36.6	17.4798	3.713
77	15	Liberty	8365	4	0.689204	0	100	0	0	75	25	0	25	0	50	25	25	25	25	0	25	25	50	0	0	25	0	0	0	0	0	100	0	0	0	0	0	100	0	0	0	0	0	0	26.7123	39.9	37.2	18.9051	3.56196
79	12	Madison	18474	10	11.6205	30	70	50	50	0	0	10	30	0	40	20	50	0	20	0	30	10	50	20	10	10	0	0	20	20	0	60	0	0	0	0	0	100	0	0	0	0	0	0	27.4834	35.9	32.8	16.9571	3.76222
81	49	Manatee	373853	206	101.684	28.1553	71.8447	24.7573	39.3204	34.9515	0.970874	8.25243	62.6214	0.970874	21.3592	6.79612	26.2136	14.0777	22.8155	0.970874	35.9223	8.73786	38.3495	18.4466	9.70874	16.5049	0.970874	7.28155	14.0777	18.4466	1.45631	59.7087	0	1.94175	3.8835	0	0.485437	92.7184	3.8835	0.970874	0	1.94175	0.485437	4.85437	19.3932	26.3	25.1	22.9311	3.11734
83	34	Marion	348371	245	6.31176	16.3265	83.6735	33.8776	28.9796	34.6939	2.44898	7.7551	66.9388	1.63265	19.1837	4.4898	26.1224	10.2041	22.8571	2.04082	38.7755	17.551	47.3469	16.3265	7.34694	6.93878	2.44898	2.04082	11.0204	22.0408	0.408163	60.8163	0.816327	1.63265	2.04082	0.408163	0.816327	93.8776	3.26531	1.22449	0	1.22449	0.408163	11.0204	20.9301	32.8	32.9	16.7678	3.84308
85	55	Martin	157581	98	2.50233	18.3673	81.6327	18.3673	38.7755	38.7755	4.08163	2.04082	61.2245	2.04082	24.4898	10.2041	23.4694	10.2041	20.4082	1.02041	44.898	11.2245	34.6939	16.3265	10.2041	14.2857	2.04082	11.2245	15.3061	18.3673	4.08163	57.1429	0	4.08163	1.02041	0	0	94.898	2.04082	1.02041	0	1.02041	1.02041	9.18367	18.6234	19.9	22.5	25.3182	3.14764
86	65	Miami-Dade	2715516	784	50.7405	21.1735	78.8265	32.6531	36.8622	27.551	2.93367	6.88776	54.2092	0.510204	28.9541	9.43878	34.8214	6.63265	22.9592	1.78571	33.801	19.5153	30.3571	11.0969	7.65306	16.8367	4.08163	10.4592	10.5867	26.4031	2.16837	45.2806	1.02041	3.31633	9.94898	0.382653	0.892857	86.9898	10.3316	0.765306	0.255102	0.255102	1.40306	64.2857	15.937	22.4	22.9	18.6109	2.38911
87	64	Monroe	76325	74	0.263479	18.9189	81.0811	27.027	50	22.973	0	4.05405	52.7027	0	32.4324	10.8108	31.0811	5.40541	32.4324	0	31.0811	9.45946	44.5946	17.5676	13.5135	9.45946	1.35135	4.05405	14.8649	21.6216	1.35135	55.4054	1.35135	5.40541	0	0	0	95.9459	0	1.35135	0	2.7027	0	10.8108	17.419	20.9	22.8	25.1936	2.05967
89	8	Nassau	80578	47	5.70815	23.4043	76.5957	31.9149	38.2979	25.5319	4.25532	2.12766	59.5745	2.12766	29.7872	6.38298	19.1489	14.8936	31.9149	4.25532	29.7872	14.8936	36.1702	14.8936	6.38298	17.0213	4.25532	6.38298	8.51064	23.4043	0	55.3191	0	2.12766	2.12766	4.25532	4.25532	95.7447	2.12766	0	0	0	2.12766	8.51064	19.8519	29.6	24	24.3448	2.93618
91	4	Okaloosa	200737	125	16.2142	19.2	80.8	45.6	34.4	16.8	3.2	4.8	46.4	0	38.4	10.4	32	5.6	23.2	0.8	38.4	12.8	33.6	24.8	9.6	8	0.8	10.4	12.8	25.6	0	57.6	0	1.6	2.4	0	0	90.4	4.8	0.8	0	4	0	5.6	19.8787	27.3	29.2	21.4243	2.68001
93	51	Okeechobee	40572	21	1.03738	23.8095	76.1905	23.8095	42.8571	23.8095	9.52381	14.2857	42.8571	0	33.3333	9.52381	33.3333	4.7619	23.8095	4.7619	33.3333	42.8571	33.3333	9.52381	4.7619	4.7619	4.7619	0	9.52381	52.381	0	38.0952	0	0	0	0	0	100	0	0	0	0	0	23.8095	25.7286	33.8	36.7	17.6319	3.4661
95	41	Orange	1321194	422	107.266	23.4597	76.5403	43.128	36.4929	17.5355	2.8436	8.05687	50	1.4218	29.8578	10.6635	41.2322	5.92417	22.0379	0.236967	30.5687	12.3223	35.545	20.6161	9.71564	14.6919	0.473934	6.63507	15.8768	28.91	0.7109	48.1043	0	1.65877	4.02844	0.7109	0	80.8057	12.3223	3.5545	0	1.89573	1.4218	22.5118	15.7535	27.1	24.3	17.508	2.90703
97	45	Osceola	338619	133	1.03948	24.0602	75.9398	41.3534	35.3383	20.3008	3.00752	8.27068	49.6241	0	34.5865	7.5188	33.8346	8.27068	18.0451	0.75188	39.0977	13.5338	42.8571	16.5414	6.76692	15.7895	0.75188	3.7594	11.2782	31.5789	2.25564	49.6241	0	2.25564	2.25564	0.75188	0	90.9774	7.5188	1.50376	0	0	0	32.3308	16.5079	31.6	29.4	16.9444	3.28
99	58	Palm Beach	1446277	667	20.6416	25.7871	74.2129	28.1859	40.6297	28.6357	2.54873	6.14693	52.6237	2.54873	32.2339	6.44678	35.8321	8.9955	27.4363	1.34933	26.3868	11.6942	35.3823	15.2924	6.89655	18.2909	2.24888	10.1949	24.2879	19.94	1.49925	44.6777	0.5997	1.64918	6.14693	0.89955	0.29985	90.5547	7.34633	0.749625	0	1.04948	0.29985	13.6432	16.6345	22.2	26.7	22.0603	3.26703
101	43	Pasco	510593	324	2.19142	20.0617	79.9383	32.716	39.1975	25.6173	2.46914	4.62963	66.0494	0.617284	20.0617	8.64198	32.0988	9.5679	21.9136	1.23457	35.1852	16.6667	42.9012	14.8148	8.95062	11.4198	1.85185	3.39506	12.6543	27.7778	0.925926	55.5556	0.308642	1.85185	0.925926	0	0	93.5185	1.23457	1.85185	0.308642	2.46914	0.617284	8.02469	21.4677	31.2	29.8	21.6712	3.49246
103	63	Pinellas	957875	570	10.8656	26.4912	73.5088	30.5263	41.5789	26.3158	1.57895	5.61404	62.807	1.40351	22.807	7.36842	34.9123	6.84211	26.4912	2.2807	29.4737	10.5263	35.0877	16.1404	10	19.6491	2.45614	6.14035	15.9649	24.2105	1.92982	47.7193	0.877193	2.2807	6.49123	0	0.526316	95.614	2.2807	1.05263	0	1.05263	0	5.08772	20.2488	27.3	23.3	23.6508	2.97723
105	44	Polk	668671	330	3.26288	25.7576	74.2424	35.1515	34.5455	28.1818	2.12121	9.09091	60.303	0.30303	19.3939	10.9091	26.9697	9.39394	24.8485	1.21212	37.5758	22.7273	43.0303	13.0303	8.78788	8.18182	1.51515	2.72727	19.0909	20	0.606061	55.1515	0.606061	1.51515	2.42424	0.606061	0	91.8182	6.36364	0.30303	0.30303	0.30303	0.909091	13.0303	20.624	36.5	28.9	17.969	3.68926
107	31	Putnam	72766	54	0.754707	22.2222	77.7778	22.2222	37.037	38.8889	1.85185	1.85185	70.3704	1.85185	11.1111	14.8148	20.3704	12.963	22.2222	0	44.4444	24.0741	37.037	20.3704	9.25926	5.55556	1.85185	1.85185	11.1111	22.2222	0	64.8148	0	1.85185	0	0	0	98.1481	0	0	0	1.85185	0	1.85185	27.3922	38.6	37.6	18.7379	4.32933
113	2	Santa Rosa	235503	103	15.0227	22.3301	77.6699	38.835	41.7476	15.534	3.8835	4.85437	48.5437	0.970874	37.8641	7.76699	26.2136	8.73786	22.3301	0.970874	41.7476	18.4466	34.9515	19.4175	13.5922	7.76699	0	5.82524	12.6214	23.301	0	60.1942	0.970874	1.94175	0	0	0.970874	95.1456	1.94175	0.970874	0	1.94175	0	2.91262	16.3839	23.1	21.6	21.4044	2.6377
115	53	Sarasota	305591	270	10.5453	25.5556	74.4444	23.3333	35.9259	38.8889	1.85185	5.92593	65.9259	1.85185	22.963	3.33333	25.1852	11.1111	29.6296	0.37037	33.7037	9.25926	35.5556	16.2963	7.77778	15.5556	2.22222	13.3333	22.2222	21.4815	1.48148	49.2593	0.37037	1.11111	3.33333	0	0.740741	96.2963	2.22222	0.37037	0	0.37037	0.740741	2.59259	20.2136	31.2	29	19.4271	3.94319
117	39	Seminole	170442	175	6.02608	17.7143	82.2857	38.2857	44	15.4286	2.28571	4.57143	65.7143	1.71429	22.2857	5.71429	36.5714	5.71429	24	1.71429	32	9.71429	37.1429	15.4286	9.71429	17.7143	1.71429	8.57143	12	25.7143	0	55.4286	0.571429	4.57143	1.14286	0	0.571429	89.1429	4.57143	2.85714	0	1.71429	1.71429	12.5714	21.4741	31.1	29.4	23.0902	2.96129
109	24	St. Johns	412144	155	8.85136	17.4194	82.5806	25.1613	47.7419	23.871	3.22581	6.45161	60	1.29032	30.3226	1.93548	21.9355	5.80645	29.0323	0.645161	42.5806	9.03226	29.6774	23.871	5.80645	16.7742	0.645161	14.1935	9.67742	24.5161	2.58065	57.4194	0.645161	1.29032	3.87097	0	0	96.129	1.93548	1.29032	0	0.645161	0	4.51613	18.2011	21.4	22.5	25.6144	3.09247
111	52	St. Lucie	455086	149	3.49981	22.8188	77.1812	26.1745	38.255	34.2282	1.34228	7.38255	59.7315	2.01342	24.1611	6.71141	24.8322	12.0805	28.8591	2.01342	32.2148	10.0671	52.349	12.0805	8.05369	7.38255	4.69799	5.36913	13.4228	28.8591	2.01342	50.3356	1.34228	2.01342	1.34228	0.671141	0	91.2752	6.04027	1.34228	0	1.34228	0	10.7383	16.0002	26.3	21.8	21.3116	2.91317
119	38	Sumter	120999	73	1.49041	21.9178	78.0822	12.3288	28.7671	57.5342	1.36986	9.58904	61.6438	4.10959	20.5479	4.10959	15.0685	19.1781	17.8082	0	47.9452	13.6986	27.3973	17.8082	13.6986	17.8082	0	9.58904	20.5479	17.8082	1.36986	56.1644	0	4.10959	0	0	0	98.6301	1.36986	0	0	0	0	0	19.0492	29.3	22.6	23.1465	4.60341
121	20	Suwannee	43924	34	4.28245	23.5294	76.4706	32.3529	38.2353	23.5294	5.88235	14.7059	17.6471	0	55.8824	11.7647	26.4706	5.88235	20.5882	0	47.0588	26.4706	47.0588	14.7059	0	11.7647	0	0	8.82353	14.7059	0	73.5294	0	0	0	0	2.94118	97.0588	2.94118	0	0	0	0	2.94118	24.9242	38.8	36.4	17.7504	3.43012
123	21	Taylor	22098	14	3.04407	7.14286	92.8571	28.5714	42.8571	28.5714	0	0	21.4286	0	78.5714	0	35.7143	21.4286	7.14286	0	35.7143	28.5714	35.7143	0	7.14286	14.2857	0	14.2857	7.14286	14.2857	0	78.5714	0	0	0	0	0	92.8571	7.14286	0	0	0	0	0	26.806	35.5	34.5	16.1501	3.58488
125	28	Union	15239	9	4.12962	22.2222	77.7778	55.5556	33.3333	11.1111	0	44.4444	11.1111	0	33.3333	11.1111	33.3333	0	22.2222	11.1111	33.3333	22.2222	44.4444	0	0	11.1111	11.1111	11.1111	11.1111	33.3333	0	22.2222	0	0	0	0	33.3333	88.8889	11.1111	0	0	0	0	0	29.4616	37.4	31.6	17.8374	2.95386
127	35	Volusia	527634	374	233.317	20.0535	79.9465	32.8877	38.5027	27.2727	1.3369	8.02139	59.6257	1.3369	24.0642	6.95187	30.2139	9.62567	24.0642	1.3369	34.7594	13.369	39.0374	20.3209	7.75401	12.5668	1.87166	5.08021	13.9037	24.3316	0.802139	53.7433	0.534759	1.3369	3.74332	1.06952	0.534759	95.1872	3.74332	0	0.534759	0.26738	0.26738	7.75401	20.5812	32.1	28.7	22.8201	3.44734
129	22	Wakulla	31877	19	0.357766	31.5789	68.4211	36.8421	42.1053	21.0526	0	5.26316	26.3158	0	57.8947	10.5263	26.3158	5.26316	31.5789	0	36.8421	10.5263	21.0526	15.7895	10.5263	15.7895	5.26316	21.0526	5.26316	10.5263	0	78.9474	0	5.26316	0	0	0	100	0	0	0	0	0	0	21.8037	39.7	30.1	23.655	2.90865
131	6	Walton	65858	37	11.2778	10.8108	89.1892	29.7297	37.8378	27.027	5.40541	5.40541	62.1622	0	32.4324	0	35.1351	5.40541	10.8108	2.7027	45.9459	24.3243	21.6216	21.6216	10.8108	16.2162	2.7027	2.7027	8.10811	27.027	2.7027	59.4595	0	2.7027	0	0	0	100	0	0	0	0	0	5.40541	21.9176	31.8	31.2	20.3502	2.82484
133	7	Washington	24566	17	2.56089	17.6471	82.3529	41.1765	35.2941	23.5294	0	0	58.8235	0	41.1765	0	29.4118	11.7647	23.5294	0	35.2941	29.4118	41.1765	11.7647	5.88235	5.88235	0	5.88235	17.6471	23.5294	0	47.0588	0	11.7647	0	0	0	100	0	0	0	0	0	0	29.004	37.7	34.9	17.9103	3.4098
[truncated: 5 more columns]

## Sheet: Codebook
FIPS	Federal Information Processing Standards codes for Florida
id	County Polygon IDs
County	Decedent's county of residence
pop_2018_5yrest	Florida 2018 county-level population estimate
suicide_count	2017-2019 numbers of suicide deaths
mort_rate_age_adj	2017-2018 direct age adjusted suicide mortality risks per 100,000 populations
female	Decendents who were female
male	Decendents who were male
r_18_44yrs	Decendents aged 18 to 44 years
r_45_64yrs	Decendents aged 45 to 64 years
r_65_above	Decendents aged 65 years and above
r_less_18yrs	Decendents aged less than 18 years
inpatient	Decendents who died at an inpatient facility
decendents_home	Decendents who died at their home
nursing_home	Decendents who died in a nursing home
other_place	Decendents who died at other places such as parks, etc
er_outpatient	Decendents who died at other
never_married	Decendent's who were never married
widowed	Decendent's who were widowed
divorced	Decendent's who were divorced
unknown_marital	Decendent's whose marital status was unknown
married	Decendent's who were never married
less_high	Decedent's educational attainment (less than a high school education): what was highest educational diploma/degree achieved by the decedent?
high_school	Decedent's educational attainment (Graduated high school): what was highest educational diploma/degree achieved by the decedent?
some_college	Decedent's educational attainment (Attended some college but did not graduate): what was highest educational diploma/degree achieved by the decedent?
associates	Decedent's educational attainment (Attained an associates degree): what was highest educational diploma/degree achieved by the decedent?
bachelors	Decedent's educational attainment (Attained a bachelors degree): what was highest educational diploma/degree achieved by the decedent?
unknown_educ	Decedent's educational attainment (Decendents whose education level was unknown): what was highest educational diploma/degree achieved by the decedent?
more_bacheors	Decedent's educational attainment (Attained more than a bachelors degree): what was highest educational diploma/degree achieved by the decedent?
drug_poisoning	Suicide means by drug poisoning
hanging_strang	Suicide means by hanging/strangulation
drowning	Suicide means by drowning
firearm	Suicide means by firearm discharge
hot_objects	Suicide means by use of hot object
sharp_object	Suicide means by use of sharp object
jump_ly	Suicide means by jumping or lying down
vehicle_crashing	Suicide means by vehicle crashing
other_means	Suicide means by other unspecified means
race_white	Decendent's who were white (non-Hispanic)
race_black	Decendent's who were black or African American
race_asian	Decendent's who were Asian
race_an	Decendent's who were American Indian or Alaska Natives
race_pacific_islander	Decendent's who were Pacific Islanders
other_races	Decendent's who were of other races
hisp_latino	Decendent's who were white (non-Hispanic)
smoker	Percentage of adults that reported currently smoking (BRFSS)
obese	Percentage of adults that report BMI >= 30 (CDC Diabetes Interactive Atlas)
physically_inactive	Percentage of adults that report no leisure-time physical activity (CDC Diabetes Interactive Atlas)
excessive_drinking	Percentage of adults reporting binge or heavy drinking (BRFSS)
unemployment	Percentage of population ages 16+ unemployed and looking for work
freq_mental_distress	Percentage of adults that reported having frequent mental distress (BRFSS)
food_insecure	Percentage of adults that reported being food insecure (Map the Meal Gap)
insuff_sleep	Percentage of adults that reported having insufficient sleep (BRFSS)
child_single_parenthood	Percentage of children that live in a household headed by single parent (ACS)
veterans	Percentage of Veterans
